# Supplementary material
Source: publisher site journal article supplement (https://www.degruyterbrill.com/publication/isbn/9783111027227/downloadAsset/9783111027227_Loesungen.pdf)
Supplement: Supplementary file 1 [file 9783111027227_Loesungen.pdf]

DE GRUYTER  
OLDENBOURG

STUDIUM

*Siegfried Hunklinger, Christian Enss*

# FESTKÖRPER- PHYSIK

6. AUFLAGE

Lösungen der Übungsaufgaben

# Lösungen der Übungsaufgaben

Festkörperphysik, 6. Auflage

S. Hunklinger, C. Enss

## Kapitel 2

### 1. Bindungstypen

| Bindungstyp     | Van der Waals | Ionische | Kovalent | Metallisch | Wasserstoff |
|-----------------|---------------|----------|----------|------------|-------------|
| Argon           | •             |          |          |            |             |
| Magnesium       |               |          |          | •          |             |
| Graphit         | •             |          | •        |            |             |
| Diamant         |               |          | •        |            |             |
| Quarkristall    |               | •        | •        |            |             |
| Quarzglas       |               | •        | •        |            |             |
| Polyethylen     | •             |          | •        |            |             |
| GaAs            |               | •        | •        |            |             |
| KBr             |               | •        |          |            |             |
| NH <sub>3</sub> |               | •        |          |            | •           |

### 2. Festes Helium

Der unterschiedliche Kernspin von <sup>3</sup>He und <sup>4</sup>He bewirkt, dass die beiden Isotope völlig unterschiedliche Tieftemperatureigenschaften aufweisen. Die Nullpunktsenergie berechnen wir durch Vergleich mit der Nullpunktsenergie von Xenon.

Bindungsenergie von Helium:  $\frac{U_B}{N} = -8,61 \epsilon_{\text{He}} = -7,4 \text{ meV}$ ,

Verhältnis der Nullpunktsenergien von He und Xe:  $\frac{U_{0,\text{He}}}{U_{0,\text{Xe}}} = \sqrt{\frac{\epsilon_{\text{He}}}{\sigma_{\text{He}}^2 M_{\text{He}}} \frac{\sigma_{\text{Xe}}^2 M_{\text{Xe}}}{\epsilon_{\text{Xe}}}}$ ,

Nullpunktsenergien von <sup>3</sup>He und <sup>4</sup>He:  $U_{0,^3\text{He}} = 12,8 \text{ meV}$ ,  $U_{0,^4\text{He}} = 11,1 \text{ meV}$ ,

Vergleich Bindungsenergie und Nullpunktsenergie:  $|U_{0,\text{He}}| > |U_{\text{B,He}}|$ .

Verfestigung von Helium tritt unter einem hydrostatischen Druck von  $p > 2,5 \cdot 10^6 \text{ Pa}$  bei <sup>4</sup>He bzw. von  $p > 3,3 \cdot 10^6 \text{ Pa}$  bei <sup>3</sup>He auf.

### 3. Gleichgewichtsabstand

(a)  $r_0 = \left( \frac{nA}{mB} \right)^{\frac{1}{n-m}},$

- (b) Abstoßung für  $r < r_0,$   
 Anziehung für  $r > r_0.$

Die Kraft ist maximal bei  $r_{\max} = r_0 \left( \frac{n+1}{m+1} \right)^{\frac{1}{n-m}}.$

Für das Lenard-Jones-Potential gilt mit  $n = 12$  und  $m = 6$ :

$$r_{\max} = r_0 \left( \frac{13}{7} \right)^{\frac{1}{6}} = 1,11 r_0.$$

### 4. Van-der-Waals-Kraft zwischen Kryptonatomen

- (a) Gleichgewichtsabstand:  $r_0 = \sqrt[6]{2} \sigma = 4,10 \text{ \AA},$   
 (b) Energieabsenkung durch die Van-der-Waals-Wechselwirkung:  $U_{\text{vdV}} = -2\varepsilon = -28,2 \text{ meV},$   
 (c) Energieanhebung durch die abstoßende Kräfte:  $U_{\text{ab}} = \varepsilon = 14,1 \text{ meV},$   
 (d) Bindungsenergie:  $U_{\text{B}} = -\varepsilon = -14,1 \text{ meV}.$   
 (e) Verhältnis Anziehung zu Abstoßung:  $\frac{U_{\text{vdW}}}{U_{\text{ab}}} = -2.$

### 5. Edelgasfilm

- (a) Atomanordnung:

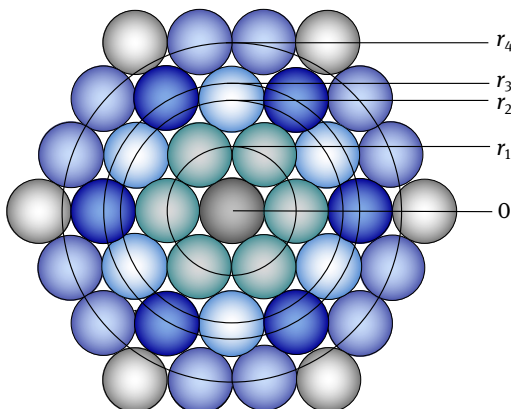

Abb. 1: Abstand und Anzahl der Nachbarn.

(b) Zahl und Abstand benachbarter Atome:

| Abstand der Nachbarn | $a$ | $\sqrt{3}a$ | $2a$ | $\sqrt{7}a$ |
|----------------------|-----|-------------|------|-------------|
| Zahl der Nachbarn    | 6   | 6           | 6    | 12          |

$$\text{Bindungsenergie: } U_B = 2N\varepsilon \left[ \left( \frac{\sigma}{R} \right)^{12} 6,00978 - \left( \frac{\sigma}{R} \right)^6 6,350958 \right],$$

(c) Gleichgewichtsabstand:  $\bar{R}_0 = 1,11 \sigma$ ,

(d) Abstand der Xenonatome:  $\bar{R}_0 = 4,43 \cdot 10^{-8} \text{ cm}$ ,

(e) Vergleich mit dreidimensionalem Xenonkristall:  $\frac{\bar{R}_0}{R_0} = \frac{4,43}{4,34} = 1,02$ .

## 6. Bindungsenergie

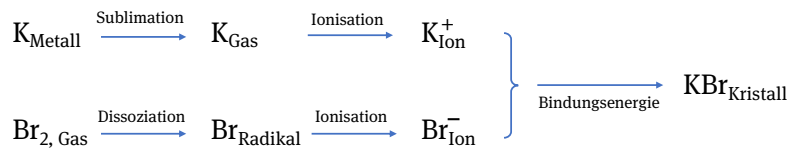

$$[E_{\text{sub}} + E_{\text{ion}}] + [E_{\text{diss}/2} - E_{\text{aff}}] + E_{\text{reak}} = -E_{\text{bind}}$$

Mit den angegebenen Zahlen findet man  $E_{\text{bind}} = -15,4 \text{ kJ/cm}^3$  pro KBr-Paar bzw.  $E_{\text{bind}} = -6,91 \text{ eV}$ .

## 7. Zweidimensionales Ionengitter

Vergrößert man die Evjen-Zellen, so findet man für die Madelung-Konstante folgende Werte:

$$\alpha_1 = 1,2929, \quad \alpha_2 = 1,6069,$$

$$\alpha_3 = 1,6106, \quad \alpha_4 = 1,613614.$$

Die Madelung-Konstante der Zelle mit 81 Ionen weicht ungefähr  $10^{-3}$  vom Wert der unendlich großen Probe ab.

## 8. Ionenkristalle

(a)  $R_0 = 3,20 \cdot 10^{-10} \text{ m}$ ,

(b)  $z_A = 1,21 \cdot 10^{-133} \text{Ws} \cdot \text{m}^{12}$ ,

(c)  $n = 1 + \frac{72\pi\epsilon_0 BR_0^4}{\alpha e^2} = 9,20$ .

(d) Der Gleichgewichtsabstand ist kleiner als vom Lennard-Jones-Potential vorhergesagt.

(e) Die Daten weisen auf KCl hin.

### 9. Evjen-Zellen Methode

1. Schale:  $\alpha_1 = \frac{6\left(\frac{1}{2}\right)}{\sqrt{1}} - \frac{12\left(\frac{1}{4}\right)}{\sqrt{2}} + \frac{8\left(\frac{1}{8}\right)}{\sqrt{3}} = 1,456$

$\frac{\quad}{(100)} \quad \frac{\quad}{(110)} \quad \frac{\quad}{(111)}$

2. Schale:  $\alpha_2 = \frac{6\left(\frac{1}{2}\right)}{\sqrt{1}} - \frac{12\left(\frac{3}{4}\right)}{\sqrt{2}} + \frac{8\left(\frac{7}{8}\right)}{\sqrt{3}}$  verbleibender Teil der inneren Schale

$\frac{\quad}{(100)} \quad \frac{\quad}{(110)} \quad \frac{\quad}{(111)}$

$$- \frac{6\left(\frac{1}{2}\right)}{\sqrt{4}} + \frac{24\left(\frac{1}{2}\right)}{\sqrt{5}} - \frac{24\left(\frac{1}{2}\right)}{\sqrt{6}} - \frac{12\left(\frac{1}{4}\right)}{\sqrt{8}} + \frac{24\left(\frac{1}{4}\right)}{\sqrt{9}} - \frac{8\left(\frac{1}{8}\right)}{\sqrt{12}} = 0,29$$

$\frac{\quad}{(200)} \quad \frac{\quad}{(210)} \quad \frac{\quad}{(211)} \quad \frac{\quad}{(220)} \quad \frac{\quad}{(221)} \quad \frac{\quad}{(222)}$

$\implies \alpha = \alpha_1 + \alpha_2 = 1,75$ .

Exakter Wert:  $\alpha = 1,74756 \dots$

### 10. Bindungsenergie von Lithium

Mit dem kritischen Radius  $R_c = 1,29 a_0$  erhält man den Wert  $r_s = 3,16 a_0$  für den Wigner-Seitz-Radius und somit

$E_B = -6,50 \text{ eV/Atom}$ ,

$E_B - E_{2s} = -1,10 \text{ eV/Atom}$ .

## Kapitel 3

### 1. Ag-Cu-Legierungen

- (a)  $c_\alpha \approx 11,5\%$  bei  $T = 1100\text{ K}$ ,  
 $c_\alpha \approx 14,0\%$  bei  $T = 1050\text{ K}$ .
- (b) Der Abbildung lässt sich Folgendes entnehmen:  
 $\alpha$ )  $T > 1150\text{ K}$  (flüssige Phase),  
 $\beta$ )  $1050\text{ K} < T < 1150\text{ K}$  (flüssige und feste, kupferreiche Phase),  
 $\gamma$ )  $T < 1052\text{ K}$   
 Die Zusammensetzung der festen Phasen hängt von der Temperatur ab.
- (c) Schreiben wir  $f_\alpha$  und  $f_\beta$  für die relativen Anteile der Phasen, so gilt  
 $c = f_\alpha c_\alpha + f_\beta c_\beta$  und  $f_\alpha + f_\beta = 1$ .  
 Für die Werte  $c = 0,6$ ,  $c_\alpha = 0,15$  und  $c_\beta = 0,95$  folgt aus der Abbildung  

$$\frac{f_\alpha}{f_\beta} = \frac{c_\beta - c}{c - c_\alpha} = 0,78.$$

Im thermischen Gleichgewicht ändert sich das Mischungsverhältnis mit abnehmender Temperatur. Bei den üblichen Kühlraten ist das Mischungsverhältnis jedoch praktisch eingefroren.

### 2. Hypothetisches zweidimensionales Gitter

- (a) Ein möglicher Satz von Basisvektoren ist in Bild 2a eingezeichnet. Für sie gilt:

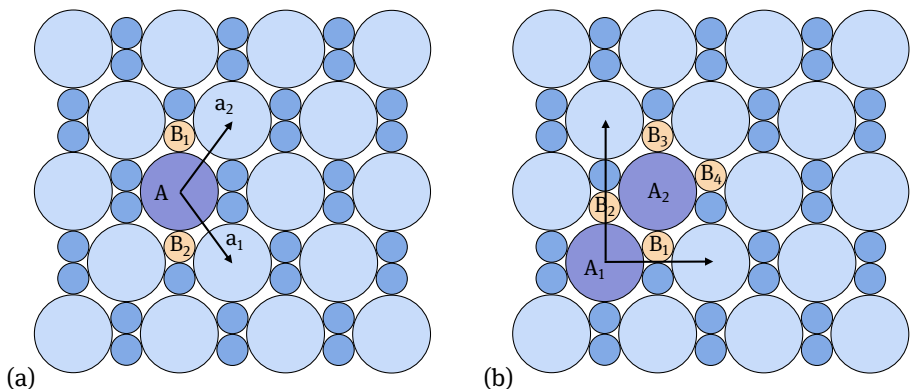

Abb. 2: Hypothetischer zweidimensionaler Kristall.

$$\mathbf{a}_1 = (a_x, -a_y) \quad \text{und} \quad \mathbf{a}_2 = (a_x, a_y)$$

$$\text{mit } a_x = \sqrt{(r_A + r_B)^2 - r_B^2} = 2,68 \text{ \AA} \quad \text{und} \quad a_y = r_A + 2r_B = 3,60 \text{ \AA} .$$

(b) Die chemische Formel lautet  $\text{AB}_2$ . Für die Flächendichte finden wir

$$\rho = \frac{m_A + 2m_B}{2a_x a_y} = 5,42 \cdot 10^{-8} \frac{\text{g}}{\text{cm}^2} .$$

(c) Die Koordinaten der Atome in der Elementarzelle sind durch

$$A(0, 0), \quad B_1(0, r_A + r_B), \quad \text{und} \quad B_2(0, -r_A - r_B)$$

$$\text{bzw. durch } A(0, 0), \quad B_1\left(-\frac{7}{18}, +\frac{7}{18}\right) \quad \text{und} \quad B_2\left(+\frac{7}{18}, -\frac{7}{18}\right) \text{ gegeben.}$$

(d) Das Punktgitter besitzt eine zwei-zählige Achse und zwei Spiegelebenen.

(e) Das orthogonale Gitter (siehe Bild 2b) weist zwei Gitterpunkte, also zwei A-Atome und vier B-Atome auf. Eine mögliche Wahl der Gittervektoren ist

$$\mathbf{a}'_1 = (2a_x, 0) \quad \text{und} \quad \mathbf{a}'_2 = (0, 2a_y) .$$

Dann sind die Atomkoordinaten durch

$$A_1 = (0, 0), \quad A_2 = \left(\frac{1}{2}, \frac{1}{2}\right), \quad B_1\left(\frac{1}{2}, \frac{r_B}{2a_y}\right), \quad B_2 = \left(0, \frac{r_A + r_B}{2a_y}\right),$$

$$B_3 = \left(\frac{1}{2}, \frac{2r_A + 3r_B}{2a_y}\right) \quad \text{und} \quad B_4 = \left(1, \frac{r_A + 3r_B}{2a_y}\right) \text{ gegeben.}$$

### 3. Allotropie von Eisen

$$\text{bcc} : \quad a_{\text{bcc}} \sqrt{3} = 4r, \quad V_{\text{bcc}} = \frac{a^3}{2} = 6,16 r^3 ,$$

$$\text{fcc} : \quad a_{\text{fcc}} \sqrt{2} = 4r, \quad V_{\text{fcc}} = \frac{a^3}{4} = 5,67 r^3 .$$

Daraus ergibt sich das Volumenverhältnis:  $\frac{V_{\text{bcc}}}{V_{\text{fcc}}} = 0,92$  . Die gemessene Änderung ist kleiner, weil sich der Abstand der nächsten Nachbarn ebenfalls etwas ändert, der hier als konstant vorausgesetzt wurde.

### 4. Kubische Kristalle

$$(a) \quad a_{\text{bcc}} = \frac{4r}{\sqrt{3}}, \quad a_{\text{fcc}} = \frac{4r}{\sqrt{2}},$$

$$(b) \quad V_{\text{bcc}} = \frac{32}{3\sqrt{3}} r^3, \quad V_{\text{fcc}} = \frac{8}{\sqrt{2}} r^3 ,$$

$$(c) \quad a_{\text{Fe}} = \sqrt[3]{\frac{2m_{\text{Fe}}}{\rho_{\text{Fe}}}} = 2,87 \text{ \AA}, \quad a_{\text{Cu}} = \sqrt[3]{\frac{4m_{\text{Cu}}}{\rho_{\text{Cu}}}} = 3,61 \text{ \AA} .$$



## 5. Phasenumwandlung von Zinn

Für die Zahl der Atome pro Elementarzelle erhalten wir  $n \approx 8$  für  $\alpha$ -Zinn bzw.  $n \approx 4$  für  $\beta$ -Zinn. Dies bedeutet, dass in beiden Fällen die Basis jeweils aus zwei Atomen besteht.

## 6. Kohlenstoffgitter

Zahl  $N$  der Kohlenstoffatome pro Elementarzelle:

Diamant:  $N = 8$ ,  $\rho = 3,50 \text{ g/cm}^3$ ,

Graphit:  $N = 4$ ,  $\rho = 2,27 \text{ g/cm}^3$ ,

Fulleren:  $N = 240$ ,  $\rho = 1,68 \text{ g/cm}^3$ .

## 7. Dichteste Kugelpackung

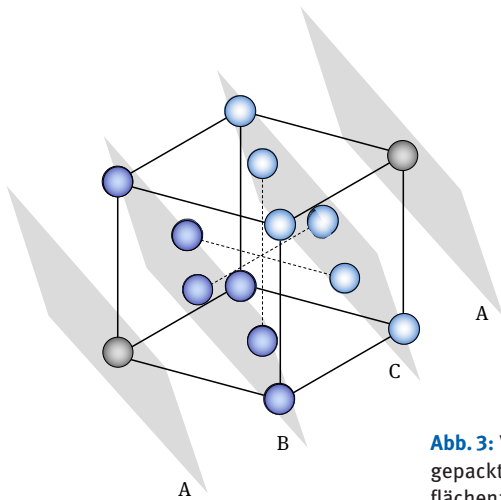

**Abb. 3:** Veranschaulichung der Lagen der dichtgepackten Atomschichten in einem kubisch-flächenzentrierten Gitter mit monatomarer Basis.

(a)  $a_{\text{fcc}} = 2\sqrt{2}r$ ,

(b)  $(c/a)_{\text{hcp}} = \sqrt{8/3}$ .

## 8. Struktur von Edelgaskristallen

Für das kubisch raumzentrierte Gitter finden wir mit den Daten von Xenon die Werte  $R_0 = 4,32 \text{ \AA}$  und  $U_B = -6,85 \text{ Ne}$ . Damit ergibt sich für die Bindungsenergie  $U_B/N = -137 \text{ meV}$ . Dieser Wert liegt deutlich unter dem des realen Xenons.

## 9. Hexagonales Gitter

Folgende Symmetrieelemente treten auf:

- eine 6-zählige vertikale Drehachse,
- drei vertikale Symmetrieebenen, welche die gegenüberliegende Ecken des Hexagons verbinden,
- drei vertikale Symmetrieebenen, die gegenüberliegende Kantenmitten des Hexagons verbinden,
- eine horizontale Symmetrieebene in halber Höhe,
- drei 2-fache horizontale Rotationsachsen durch die Mittelpunkte gegenüberliegender Rechtecke,
- drei 2-fache horizontale Rotationsachsen, welche die vertikalen Kanten der Rechtecke in der Mitte schneiden,
- ein Inversionszentrum in der Mitte der Zelle.

## 10. Nanoröhren

Röhrenumfang  $U \approx 69 \text{ \AA} \approx 16 \cdot 4,26 \text{ \AA} = 16 s$ , wobei  $s = 4,26 \text{ \AA}$  für den Abstand zwischen zwei gleichwertigen Kohlenstoffatomen steht.

Jede Lage senkrecht zur Achse enthält daher  $2 \cdot 16 = 32$  Atome.

Der Abstand der Lagen ist durch  $\frac{\sqrt{3}}{2} \cdot 1,42 \text{ \AA} = 1,23 \text{ \AA}$  gegeben.

Somit besteht das betrachtete Röhrrchen aus  $N \approx 2,6 \cdot 10^8$  Atomen und besitzt daher die Masse  $M \approx 5,2 \cdot 10^{-18} \text{ kg}$ .

Das Ergebnis hängt nicht vom Röhrentyp ab. Da die Zahl der Endflächenatome klein im Vergleich zur Gesamtzahl der Atome ist, können sie vernachlässigt werden.

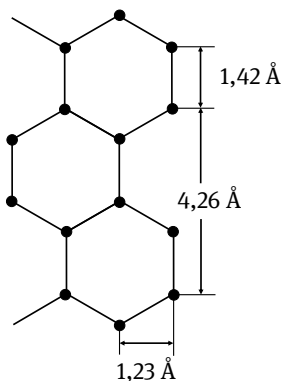

Abb. 4: Lage der Atome entlang des Umfangs.

## Kapitel 4

### 1. Millersche Indizes

- (a)  $\alpha = 2,86^\circ$ ,
- (b)  $d_{1200} = \frac{a}{\sqrt{401}} = 1,80 \cdot 10^{-11} \text{ m}$ ,
- (c)  $\lambda_{\max} = 2d_{hkl} = 3,6 \cdot 10^{-11} \text{ m}$ ,  $E_{\max} = 34,4 \text{ keV}$ .

### 2. Ewald-Kugel

Aus Dichte und Struktur erhalten wir die Gitterkonstante  $a = 4,23 \text{ \AA}$ .

- (a) Bild 4 entnehmen wir für den reziproken Gittervektor  $\mathbf{G}_{3\bar{1}0}$  die Größen

$$\sin \theta = \frac{1}{\sqrt{10}} \quad \text{und} \quad k_0 = \frac{G}{2} \frac{1}{\sin \theta}.$$

Damit erhalten wir  $\theta = 18,4^\circ$  und  $\lambda = 8,49 \cdot 10^{-9} \text{ cm}$ .

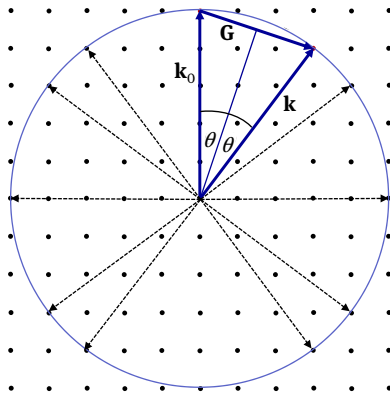

**Abb. 5:** Zweidimensionale Darstellung der Ewald-Kugel für das angesprochene Beugungsexperiment. Die auftretenden Reflexe sind gestrichelt eingezeichnet.

- (b) Unter der vorgegebenen Einfallsrichtung tritt eine große Zahl von Reflexen auf, die in Bild 4 gestrichelt eingezeichnet sind. Natürlich treten auch Reflexe auf, die nicht in der Zeichenebene liegen. Die große Zahl an Reflexen beruht auf der Tatsache, dass die angesprochenen Röntgenstrahlen in einer Richtung hoher Symmetrie einfallen.
- (c) Der angesprochene  $(1\bar{9}0)$ -Reflex kann nicht beobachtet werden.

### 3. Bragg-Reflexion

$$(a) \frac{d_{HT}}{d_{ZT}} = \frac{\sin 47,75^\circ}{\sin 46,60^\circ} = 1,0188,$$

$$(b) \frac{d_{HT}}{d_{ZT}} = 1 + \alpha \Delta T \implies \alpha = 1,88 \cdot 10^{-5} \text{ K}^{-1}.$$

### 4. Zweidimensionales hexagonales Gitter

$$\text{Basisvektoren: } \mathbf{a}_1 = \frac{a}{2} \begin{pmatrix} 2 \\ 0 \end{pmatrix}, \quad \mathbf{a}_2 = \frac{a}{2} \begin{pmatrix} 1 \\ \sqrt{3} \end{pmatrix},$$

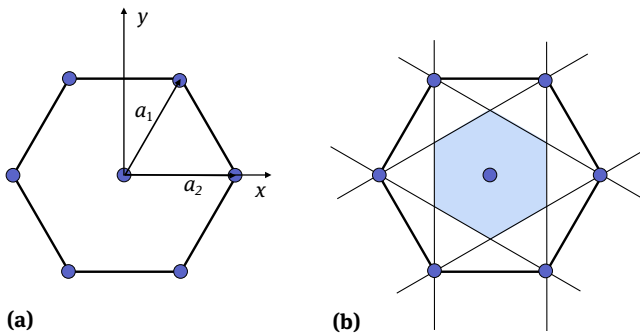

Abb. 6: Zweidimensionales hexagonales Gitter. a) Basisvektoren. b) Wigner-Seitz-Zelle.

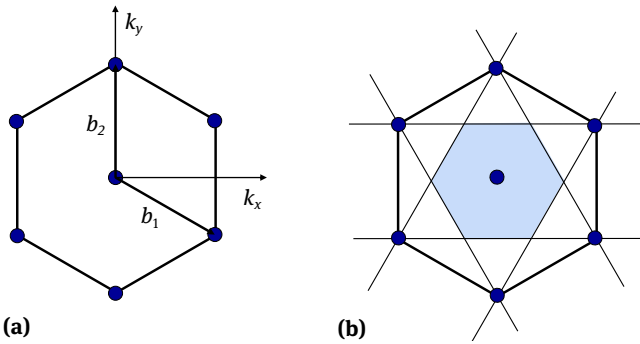

Abb. 7: a) Basisvektoren. b) 1. Brillouin-Zone.

$$\text{Reziprokes Gitter: } \mathbf{b}_1 = \frac{2\pi}{a\sqrt{3}} \begin{pmatrix} \sqrt{3} \\ -1 \end{pmatrix}, \quad \mathbf{b}_2 = \frac{2\pi}{a\sqrt{3}} \begin{pmatrix} 0 \\ 2 \end{pmatrix},$$

$$\text{Fläche der Brillouin-Zone: } F_{\text{BZ}} = \frac{8\pi^2}{\sqrt{3} a^2}.$$

### 5. Strukturfaktor von Perowskit

- (a)  $S_{hkl} = f_{\text{Ti}} + f_{\text{Ca}} e^{-i\pi(h+k+l)} + f_{\text{O}}(e^{-i\pi h} + e^{-i\pi k} + e^{-i\pi l})$ ,
- (b)  $S_{100} = f_{\text{Ti}} - f_{\text{Ca}} + f_{\text{O}}$ ,  
 $S_{200} = f_{\text{Ti}} + f_{\text{Ca}} + 3f_{\text{O}}$ ,  
 $S_{110} = f_{\text{Ti}} + f_{\text{Ca}} - f_{\text{O}}$ ,
- (c)  $S_{200}$  ist der größte,  $S_{100}$  der kleinste Strukturfaktor.

### 6. Kubisch raumzentrierte Gitter

- (a)  $\mathbf{a}_1 = \frac{a}{2}(-\hat{\mathbf{x}} + \hat{\mathbf{y}} + \hat{\mathbf{z}})$ ,  $\mathbf{a}_2 = \frac{a}{2}(\hat{\mathbf{x}} - \hat{\mathbf{y}} + \hat{\mathbf{z}})$ ,  $\mathbf{a}_3 = \frac{a}{2}(\hat{\mathbf{x}} + \hat{\mathbf{y}} - \hat{\mathbf{z}})$ ,
- (b)  $\mathbf{b}_1 = \frac{2\pi}{a}(\hat{\mathbf{y}} + \hat{\mathbf{z}})$ ,  $\mathbf{b}_2 = \frac{2\pi}{a}(\hat{\mathbf{x}} + \hat{\mathbf{z}})$ ,  $\mathbf{b}_3 = \frac{2\pi}{a}(\hat{\mathbf{x}} + \hat{\mathbf{y}})$ .
- (c) Die Basisvektoren der primitiven Elementarzelle des fcc Gitters sind:  
 $\mathbf{a}_1 = \frac{a}{2}(\hat{\mathbf{y}} + \hat{\mathbf{z}})$ ,  $\mathbf{a}_2 = \frac{a}{2}(\hat{\mathbf{x}} + \hat{\mathbf{z}})$ ,  $\mathbf{a}_3 = \frac{a}{2}(\hat{\mathbf{x}} + \hat{\mathbf{y}})$   
 und entsprechen, bis auf einen Vorfaktor, den Basisvektoren des reziproken Gitters eines bcc Kristalls, das damit auch kubische Symmetry besitzt.
- (d) Gitterkonstante des reziproken Gitters:  $b = 2\frac{2\pi}{a}$ .
- (e) Volumen der Brillouin-Zone:  $V_{\text{BZ}} = |\mathbf{b}_1 \cdot (\mathbf{b}_2 \times \mathbf{b}_3)|$ .

### 7. Pulverdiffraktometrie

- (a) Übereinstimmung findet man mit der fcc-Struktur; die Werte sprechen für Calcium.

| $2\theta$ | $\theta$ | $\sin^2 \theta$ | $N_{\text{exp}}^2$ | $N^2$ | $(hkl)$ |
|-----------|----------|-----------------|--------------------|-------|---------|
| 28°       | 14°      | 0,0585          | 3,07               | 3     | (111)   |
| 32°       | 16°      | 0,0760          | 3,99               | 4     | (200)   |
| 46°       | 23°      | 0,153           | 8,03               | 8     | (220)   |
| 54°       | 27°      | 0,206           | 10,82              | 11    | (113)   |
| 57°       | 28,5°    | 0,228           | 11,98              | 12    | (222)   |
| 130°      | 65°      | 0,821           | 43,12              | 43    | (335)   |
| 133°      | 66,5°    | 0,841           | 44,17              | 44    | (226)   |
| 146°      | 73°      | 0,915           | 48,05              | 48    | (444)   |
| 160°      | 80°      | 0,970           | 50,94              | 51    | (155)   |
| 168°      | 84°      | 0,990           | 51,99              | 52    | (046)   |

$$(b) a^2 = \frac{N^2 \lambda^2}{4 \sin^2 \theta} \implies a = 5,51 \text{ \AA},$$

$$(c) a = 5,58 \text{ \AA}.$$

### 8. Laue-Verfahren

Gitterkonstante des reziproken Gitters:  $b = 1,87 \cdot 10^{10} \text{ m}^{-3}$ ,

maximale Wellenzahl:  $k_{\max} = 2,03 \cdot 10^{11} \text{ m}^{-1}$ ,

maximale Zahl der Beugungsreflexe:  $Z \approx 5330$ .

### 9. Debye-Scherrer-Verfahren

Wellenlänge:  $\lambda = 0,381 \text{ \AA}$

## Kapitel 5

### 1. Diffusion von Leerstellen in Gold

- (a) In fcc-Kristallen ist die elementare Sprungweite durch  $a/\sqrt{2} = 2,88 \text{ \AA}$  gegeben.
- (b) Mit  $L = \sqrt{6Dt}$  und  $D = \frac{1}{6}a^2\nu_0 e^{-E_D/k_B T}$  ergibt sich  $t = 1,6 \cdot 10^{15} \text{ s}$  bei 293 K und  $t = 7,7 \cdot 10^5 \text{ s} \approx 200 \text{ h}$  bei 960 K.

### 2. Leerstellendiffusion

- (a)  $E_L + E_D = 2,67 \cdot 10^{-19} \text{ J} = 1,66 \text{ eV}$ ,
- (b)  $D_0 e^{S/k_B} = 4,39 \cdot 10^{-4} \text{ m}^2/\text{s}$ ,
- (c)  $\sigma = \frac{n_p e^2 D}{k_B T} = 1,21 \cdot 10^{-3} \frac{1}{\Omega \text{ m}}$ .

### 3. Diffusionsbarriere

Bindungsenergie Position 1 (Bild 5.32a):  $U_1 = -\left(\frac{B}{R_0^6}\right) 3,53$

Bindungsenergie Position 2 (Bild 5.32b):  $U_2 = -\left(\frac{B}{R_0^6}\right) 2,34$

Bindungsenergie Position 3 (Bild 5.32c):  $U_3 = -\left(\frac{B}{R_0^6}\right) 2,84$

Da  $U_3 < U_2$  ist, hat der Weg über Position 3 die geringere Barriere.

### 4. Leerstellen und thermische Ausdehnung

- (a) Es liegt eine Leerstellenkonzentration von  $N_L/N = 1,4 \cdot 10^{-20}$  bei 293 K und  $N_L/N = 6,1 \cdot 10^{-5}$  bei 1222 K vor.
- (b)  $\frac{\Delta V}{V} = \frac{N_L}{N}$ .
- (c) Die Leerstellen verursachen eine Ausdehnung, die durch  $\alpha_{293 \text{ K}} = 7,4 \cdot 10^{-22} \text{ K}^{-1}$  bzw.  $\alpha_{1222 \text{ K}} = 1,86 \cdot 10^{-7} \text{ K}^{-1}$  gegeben ist.
- (d) In Kapitel 4, Aufgabe 3 wurde der Wert  $\alpha = 1,88 \cdot 10^{-5} \text{ K}^{-1}$  ermittelt. Der experimentelle Wert liegt bei  $\alpha = 1,65 \cdot 10^{-5} \text{ K}^{-1}$ .

## 5. Defekte in Eisenoxid

Dichte von perfektem FeO:  $\rho = 5960 \text{ kg m}^{-3}$ , Leerstellenkonzentration: 5 %.

## 6. Farbzentren

$$(a) E_{\text{Wa}} = E_2 - E_1 = \frac{10,2}{\epsilon_r^2} [\text{eV}],$$

$$(b) E_{\text{Po}} = E_2 - E_1 = \frac{4,5 \cdot 10^{-38}}{R_0^2} [\text{J}].$$

(c) Vergleich der Ergebnisse:

|      | $R_0/\text{\AA}$ | $n'$ | $E_{\text{Wa}}/\text{eV}$ | $E_{\text{Po}}/\text{eV}$ | $E_{\text{Exp}}/\text{eV}$ |
|------|------------------|------|---------------------------|---------------------------|----------------------------|
| LiF  | 2,01             | 1,41 | 2,58                      | 6,98                      | 5,0                        |
| NaCl | 2,82             | 1,56 | 1,72                      | 3,55                      | 2,7                        |
| RbJ  | 3,67             | 1,65 | 1,38                      | 2,09                      | 1,6                        |



## Kapitel 6

### 1. Schwingender Aluminiumzylinder

Das Resonanzexperiment ergibt die Schallgeschwindigkeit  $v = 2Lv_0 = 5160$  m/s. Aus den elastischen Daten errechnet man dagegen  $v_{\text{Stab}} = \sqrt{E/\rho} = 5100$  m/s. Die Daten unterscheiden sich, da die Annahme eines langen dünnen Stabs nicht perfekt erfüllt ist.

Die Ultraschallmessung ergibt  $v_{\text{us}} = 6210$  m/s in Übereinstimmung dem errechneten Wert  $v = \sqrt{c_{11}/\rho}$  aus den elastischen Daten. Die Querkontraktion spielt hier keine Rolle.

### 2. Inelastische Neutronenstreuung

- (a) Es werden Phononen vernichtet.  
 (b)  $\nu = 6,29$  THz,  
 (c)  $\mathbf{k} = \mathbf{k}_0 + \mathbf{q} + \mathbf{G}$ ,

$$\frac{2\pi}{a} \begin{pmatrix} 2,16 \\ 1,5 \\ 0 \end{pmatrix} = \frac{2\pi}{a} \begin{pmatrix} 1,66 \\ 0 \\ 0 \end{pmatrix} + \frac{2\pi}{a} \begin{pmatrix} 0,5 \\ -0,5 \\ 0 \end{pmatrix} + \frac{2\pi}{a} \begin{pmatrix} 0 \\ 2 \\ 0 \end{pmatrix}.$$

Der Streuvektor ist durch  $\mathbf{G} = (0, 4\pi/a, 0)$  gegeben.

- (d) Die wechselwirkenden Phononen breiten sich in  $(1\bar{1}0)$ -Richtung aus und tragen den Impuls  $\sqrt{2}\pi/a$ .  
 (e) Der errechnete Wert stimmt mit dem experimentellen Ergebnis überein.

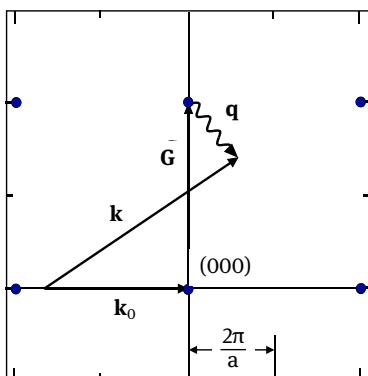

Abb. 8: Neutronenstreuung an Kupfer.

### 3. Brillouin-Streuung

(a)  $v_\ell = 4550 \text{ m/s}$ ,  $v_t = 2422 \text{ m/s}$ ,

(b)  $\vartheta = 0^\circ \implies \Delta v \approx 0$ ,

$\vartheta = 180^\circ \implies \Delta v_\ell = 27,2 \text{ GHz}$ ,  $\Delta v_t = 14,5 \text{ GHz}$ .

Es kann nur ein Tausendstel der Brillouin-Zone untersucht werden.

### 4. Akustische und thermische Phononen

(a)  $N_{\text{ph}} = 5,9 \cdot 10^{16}$ ,

(b)  $\Delta T \approx 30 \mu\text{K}$ ,

(c) Im vorgegebenen Frequenzintervall werden etwa  $5 \cdot 10^9$  Phononen angeregt.

### 5. Eindimensionale Systeme mit zweiatomiger Basis

Dispersionsrelation:  $\omega_{a,o}^2 = \frac{(C_1 + C_2)}{M} \pm \frac{1}{M} \sqrt{(C_1 + C_2)^2 - 4C_1C_2 \sin^2\left(\frac{qa}{2}\right)}$ ,

Langwelliger Grenzfall  $q = 0$ :  $\omega_a^2 = 0$ , und  $\omega_o^2 = \frac{2(C_1 + C_2)}{M}$ ,

Kurzwelliger Grenzfall  $q = \frac{\pi}{a}$ :  $\omega_a^2 = \frac{2C_2}{M}$  und  $\omega_o^2 = \frac{2C_1}{M}$ .

### 6. Dispersionsrelation eines zweidimensionalen Gitter

(a) Bewegungsgleichung:  $m \frac{d^2 u_{r,s}}{dt^2} = C(u_{r-1,s} + u_{r+1,s} + u_{r,s-1} + u_{r,s+1} - 4u_{r,s})$ .

Dispersionsrelation:  $\omega^2 = \frac{2C}{m} [1 - \cos(q_x a) - 2 \cos(q_y a)]$ .

Ausbreitung in [10]-Richtung ( $q_x = q$ ,  $q_y = 0$ ):  $\omega_{10} = 2\sqrt{\frac{2C}{m}} \left| \sin\left(\frac{qa}{2}\right) \right|$

Ausbreitung in [11]-Richtung ( $q_x^2 + q_y^2 = q^2$ ,  $q_x = q_y$ ,  $q = \sqrt{2}q_x$ ):  $\omega_{11} = 2\sqrt{\frac{2C}{m}} \left| \sin\left(\frac{qa}{2\sqrt{2}}\right) \right|$ .

(b) Langwelliger Grenzfall ( $q \rightarrow 0$ ):  $\omega_{10} = \sqrt{\frac{C}{m}} qa$  und  $\omega_{11} = \sqrt{\frac{C}{m}} qa$ .

(c) Kurzwelliger Grenzfall  $q \rightarrow \frac{\pi}{2}$ :  $\omega_{10} = 2\sqrt{\frac{C}{m}}$  und  $q \rightarrow \sqrt{2}\frac{\pi}{2}$ :  $\omega_{11} = 2\sqrt{\frac{2C}{m}}$ .

### 7. Zweidimensionales Gitter im Debye-Modell

$$(a) \mathcal{D}^{(2)}(\omega) = \frac{A}{2\pi} \frac{\omega}{v_D^2} \quad (\text{pro Phononenzweig}),$$

$$(b) \theta = \frac{2\hbar v_D}{a k_B} \sqrt{\pi},$$

$$(c) U = \int_0^{\omega_D} \mathcal{D}^{(2)} \frac{\hbar\omega}{e^{\hbar\omega/k_B T} - 1} d\omega = 2N \left(\frac{T}{\theta}\right)^2 k_B T \int_0^{x_D} \frac{x^2 dx}{e^x - 1}.$$

Grenzfälle:

Tiefe Temperaturen ( $T \rightarrow 0$ ):  $C_V \propto T^2$ .

Hohe Temperaturen ( $T \rightarrow \infty$ ): Dulong-Petit-Gesetz.

### 8. Anregungen in Gläsern

Dem Bild 6.37 entnehmen wir:

$$C_V(10 \text{ mK}) \approx 6 \cdot 10^{-6} \frac{\text{J}}{\text{kgK}}, \quad C_V(1 \text{ K}) \approx 2 \cdot 10^{-3} \frac{\text{J}}{\text{kgK}}.$$

Hieraus ergibt sich:

$$D_0(10 \text{ mK}) = 4,2 \cdot 10^{45} \text{ J}^{-1} \text{ m}^{-3}, \quad D_0(1 \text{ K}) = 1,4 \cdot 10^{46} \text{ J}^{-1} \text{ m}^{-3}.$$

Somit findet man für die Zahl der thermisch angeregten Zwei-Niveau-Systeme

$$N_{2\text{NS}}(10 \text{ mK}) = 4,0 \cdot 10^{20} \text{ m}^{-3}, \quad N_{2\text{NS}}(1 \text{ K}) = 1,3 \cdot 10^{23} \text{ m}^{-3}$$

und für die Zahl der thermisch angeregten Phononen

$$N_{\text{ph}}(10 \text{ mK}) = 1,2 \cdot 10^{16} \text{ m}^{-3}, \quad N_{\text{ph}}(1 \text{ K}) = 1,2 \cdot 10^{22} \text{ m}^{-3}.$$

## Kapitel 7

### 1. Grüneisen-Parameter

$$\alpha_V = \frac{\gamma C_V}{BV},$$

$$\gamma = \frac{\alpha_V B a^3}{24 k_B} = 1,55.$$

### 2. Drei-Phononen-Prozesse

(a) Die Prozesse a) und b) sind verboten, die Prozesse e) und f) dagegen uneingeschränkt erlaubt.

Die Prozesse c) und d) sind unter der Voraussetzung möglich, dass die Ausbreitung der Phononen kollinear erfolgt.

(b) Nun sind auch die Prozesse c) und d) untersagt.

### 3. Dämpfung durch Punktdefekte

Mit den Daten von Germanium ergibt sich für den Streuquerschnitt

$$\sigma = \pi R_0^2 (R_0 q)^4 = \pi R_0^6 \left( \frac{2\pi}{v} \right)^4 v^4 = 3 \cdot 10^{-68} v^4,$$

wobei  $R_0$  für den Abstand der benachbarten Atome und  $v$  für die Frequenz steht. Ergebnis:  $\sigma = 3 \cdot 10^{-44} \text{ m}^2$ ,  $\sigma = 3 \cdot 10^{-32} \text{ m}^2$  und  $\sigma = 3 \cdot 10^{-20} \text{ m}^2$  für 1 MHz, 1 GHz bzw. 1 THz. Defektstreuung ist also erst bei sehr hohen Frequenzen von Bedeutung. Bei einer Defektkonzentration von  $10^{22} \text{ m}^{-3}$  errechnet man für 1 THz-Phononen eine freie Weglänge von 0,3 m. Bei kleineren Frequenzen bewirken sie kaum messbare Effekte.

### 4. Wärmeleitung von Germanium

Bei 1 K finden wir für die Wärmeleitung den Wert  $\Lambda \approx C_V v d \approx 0,3 \text{ W cm}^{-1} \text{ K}^{-1}$ .

### 5. Wärmeleitfähigkeit im Casimir-Bereich

Mit Hilfe von Bild 7.17a lässt sich der Zahlenwert  $\Lambda(T = 5 \text{ K}) = 2,3 \text{ W cm}^{-1} \text{ K}^{-1}$  für die Probe mit der Kantenlänge 1,1 mm ermitteln. Für die Debye-Temperatur folgt daraus der Wert  $\Theta \approx 700 \text{ K}$  in Übereinstimmung mit dem Tabellenwert  $\Theta = 670 \text{ K}$ . In dieser einfachen Näherung ist der atomare Aufbau ohne Bedeutung.

## 6. Einfluss von Korngrenzen auf die Wärmeleitfähigkeit

Die Streuung an Korngrenzen kann in einem einfachen Modell wie die Streuung an der Oberfläche behandelt werden. Damit ergibt sich im Casimir-Bereich  $\lambda = \frac{1}{3}C_V v s$ , wobei  $s$  der mittlere Durchmesser der Kristallite ist.

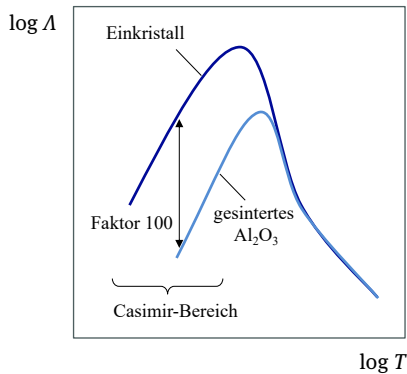

**Abb. 9:** Schematischer Verlauf der Wärmeleitfähigkeit eines Einkristalls im Vergleich zu einer gesinterten Probe.

## 7. Wärmeleitung bei tiefen Temperaturen

- Man findet folgende Querschnittsflächen:  $A_{\text{Si}} = 1 \text{ cm}^2$ ,  $A_{\text{a-SiO}_2} = 200 \text{ cm}^2$  und  $A_{\text{Cu}} = 0,25 \text{ mm}^2$ ,
- Der Temperaturanstieg ist bei der Kupferprobe am größten, bei Silizium am kleinsten.
- Die erforderlichen Heizleistungen sind  $5 \cdot 10^{-12} \text{ W}$ ,  $5 \cdot 10^{-10} \text{ W}$  und  $5 \cdot 10^{-8} \text{ W}$  bei Silizium, Quarzglas und Kupfer.

## 8. Freie Weglänge thermischer Phononen in Quarzglas

Aus den Zahlenwerten im Text lassen sich für Quarzglas die Debye-Geschwindigkeit  $v_D = 4145 \text{ m/s}$  und die Debye-Temperatur  $\theta = 500 \text{ K}$  herleiten. Damit erhält man für den Beitrag der Phononen zur spezifischen Wärme und dem Wärmetransport die Werte  $C_V(5\text{K}) = 215 \text{ J/m K}$  und  $\Lambda(5\text{K}) = 0,1 \text{ W/m K}$ . Für die mittlere freie Weglänge folgt daraus  $\ell(5\text{K}) = 3,4 \cdot 10^{-7} \text{ m}$ .

## Kapitel 8

### 1. Fermi-Verteilung

Für die mittlere Geschwindigkeit  $\bar{v}$  ergibt sich 
$$\bar{v} = \frac{\int_0^{E_F} E dE}{\int_0^{E_F} \sqrt{E} dE} = \frac{3}{4} v_F.$$

### 2. Spezifische Wärme von Kalium

Mit  $m^* = 1,19 m$  folgt bei 293 K für die spezifischen Wärmen 
$$\frac{C_V^{\text{el}}}{C_V^{\text{ph}}} = \frac{\pi^2}{6} \frac{T}{T_F} = 0,023.$$

Elektronen und Phononen tragen bei der Temperatur  $T = \sqrt{\frac{5\theta^3}{24\pi^2 T_F}}$  gleich viel zur spezifischen Wärme bei. Unter  $T = 0,88 \text{ K}$  ist  $C_V^{\text{el}} > C_V^{\text{ph}}$ .

### 3. Freies Elektronengas

(a) Natrium:  $n = 2,55 \cdot 10^{28} \text{ m}^{-3}$ ,  $k_F = 0,911 \text{ \AA}^{-1}$ ,  
 Kupfer:  $n = 8,50 \cdot 10^{28} \text{ m}^{-3}$ ,  $k_F = 1,36 \text{ \AA}^{-1}$ .

(b) Der kleinste Abstand  $k_{\text{min}}$  der Brillouin-Zonengrenze vom  $\Gamma$ -Punkt beträgt bei Natrium  $1,05 \text{ \AA}^{-1}$  und  $1,51 \text{ \AA}^{-1}$  bei Kupfer. In beiden Fällen ist  $k_{\text{min}} > k_F$ . Die Fermi-Fläche von Natrium ist fast kugelförmig, die von Kupfer besitzt Ausbeulungen in L-Richtung (vgl. Bild 9.28).

### 4. Druck der Leitungselektronen

Innere Energie am absoluten Nullpunkt:  $u_0 = \frac{U}{V} = \frac{3n}{5} E_F.$

Resultierender Druck:  $p = -\left(\frac{\partial U}{\partial V}\right)_{T,N} = \frac{2n}{5} E_F = 20,8 \text{ GPa}.$

### 5. Fermi-Fläche und Brillouin-Zone

Für den Fermi-Impulswellenvektor findet man  $k_F = \sqrt{\frac{10}{\pi}} \frac{\pi}{a} = 1,784 \frac{\pi}{a}.$

Bei schwachem Potential werden die Ecken gerundet (Bild: 10b-d).

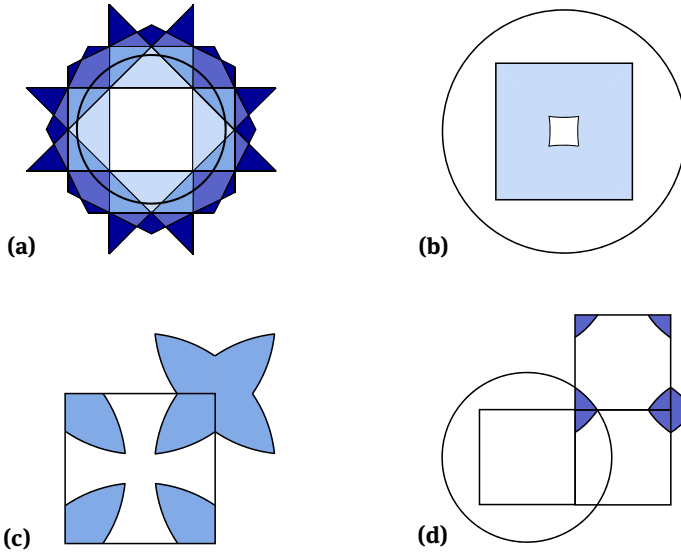

**Abb. 10:** Fermi-Flächen und Brillouin-Zone. **a)** Die ersten fünf Brillouin-Zonen im erweiterten Zonenschema. **b)** 2. Brillouin-Zone. **c)** 3. Brillouin-Zone. **d)** 4. Brillouin-Zone.

### 6. Flüssiges $^3\text{He}$

$$E_F = 1,52 \cdot 10^{-4} \text{ eV} = 1,77 \text{ K}, \quad v_F = 59 \frac{\text{m}}{\text{s}}, \quad T_F = 1,76 \text{ K},$$

$$C_V(^3\text{He}) = 6,22 \cdot 10^5 T \left[ \frac{\text{J}}{\text{m}^3\text{K}} \right].$$

Bei 50 mK findet man für  $^3\text{He}$  den Wert  $C_V(^3\text{He}) = 3,11 \cdot 10^4 \text{ J/m}^3\text{K}$ , für Kupfer nur  $C_V(\text{Cu}) = 4,84 \text{ J/m}^3\text{K}$ .

### 7. Zweikomponenten-Näherung

$$\text{Für } k = \frac{3}{8}g : v_{\pm} = -0,2 \pm 0,38 \cdot 10^6 \frac{\text{m}}{\text{s}}$$

$$\text{Für } k = -\frac{1}{4}g : v_{\pm} = -1,2 \pm 0,8 \cdot 10^6 \frac{\text{m}}{\text{s}}$$

## Kapitel 9

### 1. Fermi-Kugel

Mit  $n = 5,90 \cdot 10^{28} \text{ m}^{-3}$  und  $m^* = 1,08 m$  findet man die Verschiebung  $\frac{\delta k}{k_F} = 2,1 \cdot 10^{-11}$  und die Driftgeschwindigkeit  $v_d = 2,7 \cdot 10^{-5} \frac{\text{m}}{\text{s}}$ .

### 2. Elektrische Parameter von Kalium

Folgenden Parameter lassen sich aus den vorhandenen Daten ermitteln:

$$\begin{aligned} k_F &= 7,33 \cdot 10^9 \text{ m}^{-1}, & E_F &= 2,75 \cdot 10^{-19} \text{ J} = 1,72 \text{ eV}, \\ \tau &= 5,21 \cdot 10^{-14} \text{ s}, & \mu &= 7,70 \cdot 10^{-3} \text{ m}^2/\text{Vs}, \\ v_F &= 7,13 \cdot 10^5 \text{ m/s}, & \lambda &= 3,72 \cdot 10^{-8} \text{ m}, \\ v_d &= 3,85 \cdot 10^{-4} \text{ m/s}, & \Lambda &= 117 \text{ W/mK}. \end{aligned}$$

### 3. Stark gebundene Elektronen

(a) Dispersionskurve

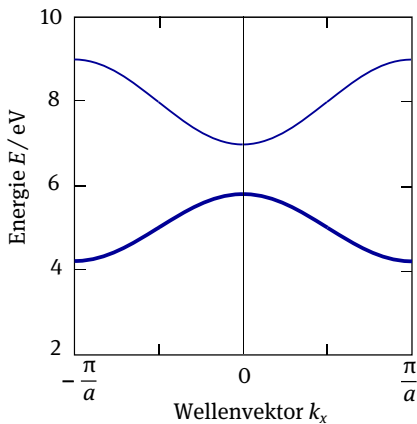

**Abb. 11:** Energiedispersionskurve. Die besetzten Zustände sind dick gezeichnet.

(b) Effektive Massen  $m_n^* = 2,17 \cdot 10^{-31} \text{ kg} = 0,24 m_e$ ,  $m_p^* = 2,71 \cdot 10^{-31} \text{ kg} = 0,30 m_e$ ,

(c) Geschwindigkeiten  $v_n = 4,86 \cdot 10^{-4} k_x \left[ \frac{\text{m}}{\text{s}} \right]$ ,  $v_p = -3,89 \cdot 10^{-4} k_x \left[ \frac{\text{m}}{\text{s}} \right]$ ,

(d) Beschleunigungen  $\dot{v}_n = -7,38 \cdot 10^{11} \frac{\text{m}}{\text{s}^2}$ ,  $\dot{v}_p = 5,91 \cdot 10^{11} \frac{\text{m}}{\text{s}^2}$ .



#### 4. Streuung an Punktdefekten

Die Relaxationszeiten  $\tau_{\text{ph}}$  und  $\tau_{\text{L}}$ , die durch die beiden Streuprozesse verursacht werden, sind durch

$$\tau_{\text{ph}} = \frac{m^*}{ne^2 \varrho_{\text{ph}}} \quad \text{und} \quad \tau_{\text{L}} = \frac{1}{N\sigma_{\text{L}}v_{\text{F}}} \quad \text{gegeben.}$$

Die beiden Streuraten sind gleich groß, wenn  $\frac{e^{E_{\text{L}}/k_{\text{B}}T}}{T_{293}/T} = \frac{3\pi a^2 m^* v_{\text{F}} e^{S_{\text{L}}/k_{\text{B}}}}{16e^2 \varrho_{293}}$  erfüllt ist.

Dies ist bei  $T \approx 495 \text{ K}$  der Fall, jedoch schmilzt Natrium bereits bei  $T_{\text{m}} = 371 \text{ K}$ .

#### 5. Streuung an einer Drahtoberfläche

Die Drahtoberfläche bewirkt eine Stoßrate  $\tau^{-1} \approx v_{\text{F}}/D$ . Somit verursacht die Oberfläche den elektrischen Widerstand

$$\varrho_{\text{Ober}} \approx \frac{m^* v_{\text{F}}}{ne^2 D} = 1,79 \cdot 10^{-8} \Omega\text{m}.$$

Der Widerstand durch Phononenstreuung steigt linear mit der Temperatur an, so dass wir

$$\varrho_{\text{Phon}}(T) = \varrho_{293} \frac{T}{293} = 7,00 \cdot 10^{-11} T$$

schreiben können. Somit tragen die beiden Mechanismen bei  $T \approx 260 \text{ K}$  gleich viel zum Widerstand bei.

#### 6. Zyklotronresonanz

$$\frac{m^*}{m} = 1,3$$

#### 7. Freie Elektronen im Magnetfeld

- (a)  $R_{\text{H}} = -4,70 \cdot 10^{-10} \text{ m}^3/\text{As}$ ,
- (b)  $p \approx 22\,000$ ,
- (c)  $r_{\text{F}} = 6 \mu\text{m}$ ,
- (d)  $\tau > 9 \text{ ps}$ .

**8. Elektrische und thermische Leitfähigkeit**

- (a) Probe A: Getemperter Golddraht,  
 Probe B: Unbehandelter Golddraht,  
 Probe C: Legierung
- (b) Probe A :  $\frac{\rho_{300}}{\rho_5} = 2800$ , Probe B :  $\frac{\rho_{300}}{\rho_5} = 100$  Probe C :  $\frac{\rho_{300}}{\rho_5} = 1$ ,  
 $T = 300 \text{ K} : \ell_A = \ell_B = 4 \cdot 10^{-8} \text{ m}$ ,  
 $T = 5 \text{ K} : \ell_A = 1 \cdot 10^{-4} \text{ m}, \ell_B = 4 \cdot 10^{-6} \text{ m}.$
- (c) In der Probe A dominiert bei Raumtemperatur die Streuung an Phononen, bei 5 K die Streuung an Defekten. In der Probe C überwiegt die Defektstreuung bei allen Temperaturen.
- (d) Mit dem Wiedemann-Franz-Gesetz ergibt sich bei 1 K:  
 $\Lambda_A = 3100 \frac{\text{W}}{\text{mK}}, \Lambda_B = 120 \frac{\text{W}}{\text{mK}} \text{ und } \Lambda_C = 0,12 \frac{\text{W}}{\text{mK}}.$

## Kapitel 10

### 1. Fermi-Niveau

Bei Zimmertemperatur liegt das Fermi-Niveau 0,31 eV über der Valenzbandkante.

### 2. Silizium

- (a)  $E_F = E_V + 0,547 \text{ eV}$ ,
- (b)  $f(E) \approx 2,3 \cdot 10^{-10}$ ,
- (c)  $n_i = p_i = 5,84 \cdot 10^{15} \text{ m}^{-3}$ ,
- (d)  $\rho = 5780 \text{ } \Omega\text{m}$ ,
- (e)  $\rho = 1,39 \cdot 10^{-3} \text{ } \Omega\text{m}$ ,
- (f)  $T = 855 \text{ K}$ .

### 3. Intrinsischer Halbleiter

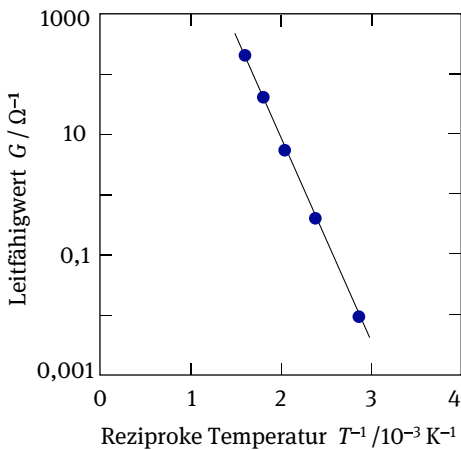

**Abb. 12:** Temperaturabhängigkeit des elektrischen Leitwerts einer Halbleiterprobe.

Für die Energielücke findet man den Wert  $E_g = 1,35 \text{ eV}$ . Es könnte sich daher um Indiumphosphid handeln. Die Energielücke entspricht einer Wellenlänge von  $0,92 \text{ } \mu\text{m}$ , so dass dieser Halbleiter bei einer Wellenlänge  $1 \text{ } \mu\text{m}$  transparent ist.

#### 4. Dotierter Halbleiter

Ionisierungsenergie:  $E_d = 4,97 \text{ meV}$ , Bahnradius:  $r = 110 \text{ \AA}$ .

Bei einem Abstand der Siliziumatom von etwa  $200 \text{ \AA}$  berühren sich die Elektronenbahnen. Daher erwarten wir die Ausbildung eines Störstellenbandes bei einer Siliziumkonzentration von etwa  $1,5 \cdot 10^{23} \text{ m}^{-3}$ .

#### 5. Dotiertes GaAs

- (a)  $T_0 = 220 \text{ K}$ ,
- (b)  $n/n_D \approx 0,33$ ,
- (c)  $T = 120 \text{ K} : (E_L - E_F) = 0,019 \text{ eV}$ ,  
 $T = 300 \text{ K} : (E_L - E_F) = 0,054 \text{ eV}$ ,
- (d)  $p = n_i^2/n \approx 20 \text{ m}^{-3}$  (!),
- (e)  $\sigma = e(n\mu_n + p\mu_p) \approx n\mu_n = 6800 (\Omega\text{m})^{-1}$ .

#### 6. Siliziumdiode

Kapazität der Raumladungszone:

$$U = 0 \rightarrow C = 56 \text{ pF},$$

$$U = 0,3 \rightarrow C = 71 \text{ pF}.$$

#### 7. p-n-Übergang

Mit  $j(U) = j_s(e^{eU/k_B T} - 1)$  ergibt sich:  $\frac{|j(0,1V)|}{|j(-0,15V)|} = 3,27 \cdot 10^6$ .

Zum Vergleich bei  $T = 300 \text{ K}$  findet man:  $\frac{|j(0,1V)|}{|j(-0,15V)|} = 59$ .

#### 8. Solarzelle

- (a) Kurzschlussstrom:  $I_L = 1,24 \text{ A}$ ,
- (b) Leerlaufspannung:  $U = 0,51 \text{ V}$ ,
- (c) Arbeitsspannung:  $U_{\text{opt}} = 0,44 \text{ V}$ .

## Kapitel 11

### 1. Spezifische Wärme

$$(a) C_s - C_n = \frac{2VB_c^2}{\mu_0 T_c^2} \left( \frac{3T^3}{T_c^2} - T \right).$$

(b) Bei  $T = T_c/\sqrt{3} = 4,15 \text{ K}$  ist  $C_s = C_n$ , d.h. im Bereich  $4,15 \text{ K} < T < 7,20 \text{ K}$  ist die spezifische Wärme im supraleitenden Zustand größer als im Normalzustand.

### 2. Kondensationsenergie

Unter Berücksichtigung der effektiven Elektronenmasse ergibt sich für die Kondensationsenergie

$$W_{\text{BCS}} = \frac{1}{4} D(E_F) \Delta^2(0) = 2970 \frac{\text{J}}{\text{m}^3}.$$

Wir vergleichen dieses Ergebnis mit dem thermischen Wert der Kondensationsenergie

$$W_{\text{ther}} = \frac{B_c^2}{2\mu_0} = 2570 \frac{\text{J}}{\text{m}^3}.$$

Ohne Berücksichtigung der effektiven Masse ist die Übereinstimmung wesentlich geringer.

### 3. Cooper-Paare

Elektron-Phonon-Wechselwirkung:  $\tilde{V}_0 = 0,25 \cdot 10^{-46} \text{ J m}^3$ .

Bindungsenergie der Cooper-Paare:  $\Delta = 1,75 \cdot 10^{-4} \text{ eV}$ .

### 4. Kritische Stromstärke

(a)  $T_c = 7,19 \text{ K}$ ,

(b)  $I_c = 397 \text{ A}$ ,

(c)  $j_c = 1,01 \cdot 10^{12} \frac{\text{A}}{\text{m}^2}$ .

### 5. Magnetfeld in einer supraleitenden Platte

$$(a) B_z(x) = B_0 \frac{\cosh(x/\lambda_L)}{\cosh(d/2\lambda_L)},$$

$$(b) j_{s,y}(x) = -\frac{B_0}{\mu_0\lambda_L} \frac{\sinh(x/\lambda_L)}{\cosh(d/2\lambda_L)}.$$

(c) Das kritische Feld erhöht sich (in erster Näherung) um den Faktor  $2\lambda_L/d$ .

### 6. Thermodynamische Eigenschaften von Aluminium

$$(a) \Delta G = G_n(0, T) - G_s(0, T) = 12,60 \mu\text{J},$$

$$(b) \Delta Q = 43,6 \mu\text{J},$$

$$(c) C_n^{\text{el}} = 91 \text{ J/K m}^{-3} \text{ bei } T_0 = T_c/\sqrt{3} = 0,68 \text{ K}.$$

### 7. Zwischenzustand

Für das mittlere Feld im Zwischenzustand eines Supraleiters 1. Art ergibt sich der Zusammenhang:  $\bar{B}_i = xB_c = \frac{B_a}{D} - \frac{1-D}{D}B_c$ , wobei  $x$  der normalleitende Anteil ist. Für  $B_a = (1-D)B_c$  ist  $\bar{B}_i = 0$  und für  $B_a = B_c$  findet man  $\bar{B}_i = B_c$ . Da  $\Phi \propto \bar{B}_i$ , ist der magnetische Fluß im Zwischenzustand linear vom äußeren Feld abhängig.

### 8. Flussschläuche

Aus dem umschlossenen Magnetfluß  $\Phi = 1,26 \cdot 10^{-5} \text{ Tm}^2$  ergibt sich, dass der Zylinder grob  $6 \cdot 10^9$  Flussschläuche enthält.

### 9. Josephson-Kontakte im Magnetfeld

Aus dem Bild 11.45 folgt, dass durch die Doppelkontakte die Flächen  $5,2 \cdot 10^{-6} \text{ cm}^2$  bzw.  $1,3 \cdot 10^{-5} \text{ cm}^2$  eingeschlossen wurden.

## Kapitel 12

### 1. Dipolwechselwirkung

Für die magnetische Dipol-Dipol-Wechselwirkung ergibt sich  $U_{\text{dip}} \approx 4,0 \cdot 10^{-24}$  J und bei 100 mK gilt  $U_{\text{dip}} \approx 3k_{\text{B}}T$ , d. h. dass die Dipol-Dipol-Wechselwirkung über 100 mK vernachlässigt werden kann.

### 2. Curie-Gesetz

Für hohe Felder und tiefe Temperaturen gilt  $x \ll 1$  und die Brillouin-Funktion (12.13) kann entwickelt werden. Das Ergebnis ist:  $\mathcal{B}(x) = \frac{(J+1)x}{J} \frac{1}{3}$ . Mit  $\chi_{\text{p}} = M/B$  folgt das Curie-Gesetz  $\chi_{\text{p}} = C/T$ .

### 3. Magnetisierung von $\text{NiFe}_2\text{O}_4$

Zahl der Nickel-Ionen im Nickel bzw. im  $\text{NiFe}_2\text{O}_4$ :

$$N_{\text{Ni}} = 9,14 \cdot 10^{28} \text{ m}^{-3}, \quad N_{\text{NiFe}_2\text{O}_4} = 2,40 \cdot 10^{28} \text{ m}^{-3}.$$

$$M_{\text{s}}(\text{NiFe}_2\text{O}_4) = 0,26 M_{\text{s}}(\text{Ni}) = 1,34 \cdot 10^5 \text{ A/m}.$$

### 4. Austauschkoeffizient

$$\text{Eisen: } \lambda = 959, \quad B_{\text{M}} = 2110 \text{ T}, \quad \mathcal{J} = 5,4 \cdot 10^{-21} \text{ J}.$$

$$\text{Nickel: } \lambda = 7300, \quad B_{\text{M}} = 4680 \text{ T}, \quad \mathcal{J} = 2,2 \cdot 10^{-21} \text{ J}.$$

### 5. Ferromagnetismus

Magnetfeld  $B$  im Abstand  $R_0$  der nächsten Nachbarn:

$$\text{Fe: } 0,27 \text{ T}, \quad \text{Co: } 0,20 \text{ T}, \quad \text{Ni: } 0,072 \text{ T}.$$

Wechselwirkungsenergie  $E/k_{\text{B}}$ :

$$\text{Fe: } 0,40 \text{ K}, \quad \text{Co: } 0,24 \text{ K}, \quad \text{Ni: } 0,03 \text{ K}.$$

Curie-Temperatur  $T_{\text{c}}$ :

$$\text{Fe: } 1043 \text{ K}, \quad \text{Co: } 1395 \text{ K}, \quad \text{Ni: } 629 \text{ K}.$$

## 6. Ferromagnetische Eigenschaften

Weisen die beiden hypothetischen Materialien den gleichen Austauschkoefizienten  $\mathcal{J}$  auf und verschwindet ihr Bahndrehimpuls, so gilt:

$$\lambda_1 = \lambda_2, \quad 3C_1 = C_2, \quad 3T_{c,1} = T_{c,2}, \quad 2M_{s,1}(T=0) = M_{s,2}(T=0).$$

## 7. Spinwellen in Nickel

$$\mathcal{J} = 1,03 \cdot 10^{-20} \text{ J}, \quad C_V^{\text{Mag}} = 4,96 T^{3/2} \left[ \frac{\text{J}}{\text{m}^3 \text{K}} \right], \quad C_V^{\text{Phon}} = 0,81 T^3 \left[ \frac{\text{J}}{\text{m}^3 \text{K}} \right],$$

$$C_V^{\text{Mag}} = C_V^{\text{Pho}} \text{ bei } T = 3,3 \text{ K}.$$

## 8. Suszeptibilität von Antiferromagneten

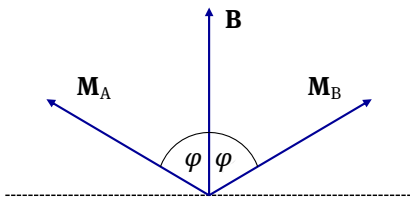

**Abb. 13:** Zur Herleitung der antiferromagnetischen Suszeptibilität.

Drehmoment des äußeren Magnetfelds wird durch das Austauschfeld kompensiert:

$$\mathbf{M}_A \times \mathbf{B} = \mathbf{M}_A \times (\mu_0 \lambda_{AA} \mathbf{M}_A + \mu_0 \lambda_{AB} \mathbf{M}_B) = \mu_0 \lambda_{AB} (\mathbf{M}_A \times \mathbf{M}_B), \quad B = 2\mu_0 \lambda_{AB} M_B \cos \varphi.$$

Für die Gesamtmagnetisierung erhalten wir somit  $|\mathbf{M}| = \frac{B}{\mu_0 \lambda_{AB}}$

und für die Suszeptibilität  $\chi_{\perp} = \frac{1}{\lambda_{AB}}$ .



## Kapitel 13

### 1. Polarisierbarkeit

$$\alpha_{\text{st}} = 1,05 \cdot 10^{-28} \text{ m}^3, \quad \alpha_{\text{opt}} = 5,42 \cdot 10^{-29} \text{ m}^3,$$

$$p_{\text{st}} = 9,33 \cdot 10^{-37} \text{ Cm}, \quad p_{\text{opt}} = 4,80 \cdot 10^{-34} \text{ Cm}.$$

### 2. Dipolmoment

(a)  $\alpha_{\text{Ge}} = 5,7 \cdot 10^{-29} \text{ m}^3,$

(b)  $\mathcal{E}_{\text{lok}} = 1870 \frac{\text{V}}{\text{m}},$

(c)  $p_{\text{Ge}} = 9,4 \cdot 10^{-37} \text{ Cm}.$

### 3. Optische Phononen

$$\omega_t = 3,29 \cdot 10^{13} \text{ s}^{-1}, \quad \omega_l = 5,16 \cdot 10^{13} \text{ s}^{-1}.$$

### 4. Dipolmoment von Chlorwasserstoff

$$\varepsilon_{\text{st}}(100 \text{ K}) \approx 24,5, \quad np^2 = 2,87 \cdot 10^{-31} \text{ C}^2/\text{m}, \quad p = 3,43 \cdot 10^{-30} \text{ Cm}.$$

### 5. Hagen-Rubens-Gesetz

(a)  $\varepsilon(\omega) = \varepsilon_{\infty} + \frac{i\sigma_0}{\varepsilon_0\omega} \frac{1}{1 - i\omega\tau} \approx \frac{i\sigma_0}{\varepsilon_0\omega}, \quad n' + i\kappa = \sqrt{\frac{\sigma_0}{2\varepsilon_0\omega}} + i\sqrt{\frac{\sigma_0}{2\varepsilon_0\omega}},$

(b)  $R \approx 1 - \frac{2}{n'} = 1 - \sqrt{\frac{8\varepsilon_0\omega}{\sigma_0}},$

(c)  $R_{\text{Ag}} = 0,9969, \quad R_{\text{Al}} = 0,9959.$

(d) In beiden Fällen ist  $\sigma_0 \gg \varepsilon_0\varepsilon_{\infty}\omega$  erfüllt. Silber:  $\omega\tau = 0,39$ , Aluminium:  $\omega\tau = 0,33$ .

### 6. Plasmakante

- (a) Die Grenze liegt bei  $\lambda_p = 1,03 \mu\text{m}.$
- (b) Minimale Reflexion tritt bei  $\lambda_p = 890 \text{ nm}$  auf.

**7. Brechungsindex und komplexe Dielektrizitätskonstante**

Extrinktionskoeffizient:  $\kappa = 1,029 \cdot 10^{-5}$

Brechungsindex:  $n = 3$

Komplexe Dielektrizitätskonstante:  $\varepsilon' = 9$  und  $\varepsilon'' = 6,17 \cdot 10^{-5}$
